# Supplementary material
Source: PubMed Central journal article supplement (PMC6533116)
Supplement: NIHMS1527005-supplement-1.pdf [file NIHMS1527005-supplement-1.pdf]

## Reporting Summary

Nature Research wishes to improve the reproducibility of the work that we publish. This form provides structure for consistency and transparency in reporting. For further information on Nature Research policies, see [Authors & Referees](#) and the [Editorial Policy Checklist](#).

### Statistics

For all statistical analyses, confirm that the following items are present in the figure legend, table legend, main text, or Methods section.

n/a Confirmed

- |                                     |                                     |                                                                                                                                                                                                                                                            |
|-------------------------------------|-------------------------------------|------------------------------------------------------------------------------------------------------------------------------------------------------------------------------------------------------------------------------------------------------------|
| <input type="checkbox"/>            | <input checked="" type="checkbox"/> | The exact sample size ( $n$ ) for each experimental group/condition, given as a discrete number and unit of measurement                                                                                                                                    |
| <input type="checkbox"/>            | <input checked="" type="checkbox"/> | A statement on whether measurements were taken from distinct samples or whether the same sample was measured repeatedly                                                                                                                                    |
| <input type="checkbox"/>            | <input checked="" type="checkbox"/> | The statistical test(s) used AND whether they are one- or two-sided<br><i>Only common tests should be described solely by name; describe more complex techniques in the Methods section.</i>                                                               |
| <input type="checkbox"/>            | <input checked="" type="checkbox"/> | A description of all covariates tested                                                                                                                                                                                                                     |
| <input type="checkbox"/>            | <input checked="" type="checkbox"/> | A description of any assumptions or corrections, such as tests of normality and adjustment for multiple comparisons                                                                                                                                        |
| <input type="checkbox"/>            | <input checked="" type="checkbox"/> | A full description of the statistical parameters including central tendency (e.g. means) or other basic estimates (e.g. regression coefficient) AND variation (e.g. standard deviation) or associated estimates of uncertainty (e.g. confidence intervals) |
| <input type="checkbox"/>            | <input checked="" type="checkbox"/> | For null hypothesis testing, the test statistic (e.g. $F$ , $t$ , $r$ ) with confidence intervals, effect sizes, degrees of freedom and $P$ value noted<br><i>Give <math>P</math> values as exact values whenever suitable.</i>                            |
| <input checked="" type="checkbox"/> | <input type="checkbox"/>            | For Bayesian analysis, information on the choice of priors and Markov chain Monte Carlo settings                                                                                                                                                           |
| <input checked="" type="checkbox"/> | <input type="checkbox"/>            | For hierarchical and complex designs, identification of the appropriate level for tests and full reporting of outcomes                                                                                                                                     |
| <input type="checkbox"/>            | <input checked="" type="checkbox"/> | Estimates of effect sizes (e.g. Cohen's $d$ , Pearson's $r$ ), indicating how they were calculated                                                                                                                                                         |

*Our web collection on [statistics for biologists](#) contains articles on many of the points above.*

### Software and code

Policy information about [availability of computer code](#)

Data collection

No software was used for data collection.

Data analysis

Bismark (v.0.14.5); bowtie2-2.2.8; BWA v0.7.17; Picard; Macs2 (v2.0.10); STAR(version 2.5.2a); ZINBWave(v. 1.0.0); edgeR (v. 3.20.1); GSEA software and Molecular Signature Database (MSigDB) (<http://www.broad.mit.edu/gsea/>); BEDTools v2.25.0; MEME-ChIP; IQ-TREE v1.5.3; FigTreev1.4.3; Python 2.7.13; R version 3.4.2.

For manuscripts utilizing custom algorithms or software that are central to the research but not yet described in published literature, software must be made available to editors/reviewers. We strongly encourage code deposition in a community repository (e.g. GitHub). See the Nature Research [guidelines for submitting code & software](#) for further information.

### Data

Policy information about [availability of data](#)

All manuscripts must include a [data availability statement](#). This statement should provide the following information, where applicable:

- Accession codes, unique identifiers, or web links for publicly available datasets
- A list of figures that have associated raw data
- A description of any restrictions on data availability

MscRRBS and single-cell Smart-seq2 datasets have been deposited to the NCBI Gene Expression Omnibus (GEO) under accession number GSE109085. ChIP-seq datasets have been deposited to the NCBI GEO under accession number GSE119103. Additional supplementary data is available upon request.

## Field-specific reporting

Please select the one below that is the best fit for your research. If you are not sure, read the appropriate sections before making your selection.

Life sciences  Behavioural & social sciences  Ecological, evolutionary & environmental sciences

For a reference copy of the document with all sections, see [nature.com/documents/nr-reporting-summary-flat.pdf](https://www.nature.com/documents/nr-reporting-summary-flat.pdf)

## Life sciences study design

All studies must disclose on these points even when the disclosure is negative.

|                 |                                                                                                                                                                                                                                                                                                                                                                                                                                                                                                                                                                                                                                                                 |
|-----------------|-----------------------------------------------------------------------------------------------------------------------------------------------------------------------------------------------------------------------------------------------------------------------------------------------------------------------------------------------------------------------------------------------------------------------------------------------------------------------------------------------------------------------------------------------------------------------------------------------------------------------------------------------------------------|
| Sample size     | We sequenced 2,652 single cells in total from 6 and 12 B cell healthy donors and CLL patients, respectively, enabling us to do statistics both at the single cell and sample level, giving us enough statistical power to detect differences in all the analyses reported in this study (e.g., epimutation rates difference, concordance odds ratio analysis, four-gamete analysis). In addition, PAC learning analysis showed that ~400K CpGs enable trees with up to 350 leaves, allowing for information loss due to random sampling of two alleles. The dataset has >80% power to detect significant ( $p < 0.05$ ), epigenetically derived subpopulations. |
| Data exclusions | No data were excluded from the study.                                                                                                                                                                                                                                                                                                                                                                                                                                                                                                                                                                                                                           |
| Replication     | We performed 18 independent biological replicates, by applying multiplexed single-cell reduced representation bisulfite sequencing (MscRRBS) to 6 different B cells healthy donors and 12 CLL patients. This translates into a total of 2,652 cells profiled by single-cell methylome sequencing. All attempts at replication were successful.                                                                                                                                                                                                                                                                                                                  |
| Randomization   | Randomization is not applicable as no experimental groups were used in our study.                                                                                                                                                                                                                                                                                                                                                                                                                                                                                                                                                                               |
| Blinding        | Blinding is not applicable as no experimental groups were used in our study.                                                                                                                                                                                                                                                                                                                                                                                                                                                                                                                                                                                    |

## Reporting for specific materials, systems and methods

We require information from authors about some types of materials, experimental systems and methods used in many studies. Here, indicate whether each material, system or method listed is relevant to your study. If you are not sure if a list item applies to your research, read the appropriate section before selecting a response.

### Materials & experimental systems

| n/a                                 | Involvement in the study                                        |
|-------------------------------------|-----------------------------------------------------------------|
| <input type="checkbox"/>            | <input checked="" type="checkbox"/> Antibodies                  |
| <input checked="" type="checkbox"/> | <input type="checkbox"/> Eukaryotic cell lines                  |
| <input checked="" type="checkbox"/> | <input type="checkbox"/> Palaeontology                          |
| <input checked="" type="checkbox"/> | <input type="checkbox"/> Animals and other organisms            |
| <input type="checkbox"/>            | <input checked="" type="checkbox"/> Human research participants |
| <input checked="" type="checkbox"/> | <input type="checkbox"/> Clinical data                          |

### Methods

| n/a                                 | Involvement in the study                        |
|-------------------------------------|-------------------------------------------------|
| <input type="checkbox"/>            | <input checked="" type="checkbox"/> ChIP-seq    |
| <input checked="" type="checkbox"/> | <input type="checkbox"/> Flow cytometry         |
| <input checked="" type="checkbox"/> | <input type="checkbox"/> MRI-based neuroimaging |

## Antibodies

|                 |                                                                                                                                                                                                                                                                                                                                                                                                                                                      |
|-----------------|------------------------------------------------------------------------------------------------------------------------------------------------------------------------------------------------------------------------------------------------------------------------------------------------------------------------------------------------------------------------------------------------------------------------------------------------------|
| Antibodies used | The antibodies used for index sorting of normal B cells were: FITC Mouse Anti-Human IgD (Clone IA6-2, BD Pharmingen), APC Mouse Anti-Human IgG (#562025, BD Biosciences), APC/Cy7 anti-human IgM Antibody (Clone MHM-88, BioLegend) and PE/Cy7 anti-human CD27 Antibody (clone O323, Bio Legend). Antibody used for ChIP is anti-H3K27ac (2 mg for 25 mg of chromatin; ab4729 Abcam, Cambridge, United Kingdom).                                     |
| Validation      | Expression of Immunoglobulin Heavy Chain (IGH) genes was assessed by scRNAseq in index-sorted B cell subpopulations validating our index-sorting strategy (CD27-IgM+IgD++IgG- [NBC], CD27-IgM+IgD+IgG- [loMBC], CD27+IgM+IgD++IgG- [intMBC], and CD27+IgG+ [hiMBC]). In addition, all antibodies used were validated for their use in FACS or ChIP-seq experiments with human samples, as shown on the website provided by the respective companies. |

## Human research participants

Policy information about [studies involving human research participants](#)

|                            |                                                                                                                                   |
|----------------------------|-----------------------------------------------------------------------------------------------------------------------------------|
| Population characteristics | Relevant information on human research participants is provided in Figure 1b, Extended Data Figure 1b and Supplementary Table 12. |
| Recruitment                | The diagnosis of CLL according to World Health Organization (WHO) criteria was confirmed in all cases by flow cytometry, or by    |

## Recruitment

lymph node or bone marrow biopsy. IRB-approved protocols for genomic sequencing of patients' samples was obtained prior to the initiation of sequencing studies. Blood samples were collected in EDTA blood collection tubes from patients and healthy adult volunteers enrolled on clinical research protocols at the Dana-Faber/Harvard Cancer Center (DF/HCC) and NewYork-Presbyterian/Weill Cornell Medical Center (NYP/WCMC), approved by the DF/HCC and NYP/WCMC Institutional Review Boards.

## Ethics oversight

The study was approved by the local ethics committee and by the Institutional Review Board (IRB) and conducted in accordance to the Declaration of Helsinki protocol. We note that the IRB does not permit collection of demographic information of healthy donors.

Note that full information on the approval of the study protocol must also be provided in the manuscript.

## ChIP-seq

### Data deposition

- Confirm that both raw and final processed data have been deposited in a public database such as [GEO](#).
- Confirm that you have deposited or provided access to graph files (e.g. BED files) for the called peaks.

## Data access links

*May remain private before publication.*

<https://www.ncbi.nlm.nih.gov/geo/query/acc.cgi?acc=GSE119103>

## Files in database submission

GSM3358078 cll\_175\_h3k27ac\_bam  
 GSM3358082 cll\_189\_h3k27ac\_bam  
 GSM3358099 cll\_248\_h3k27ac\_bam  
 GSM3358103 cll\_253\_h3k27ac\_bam

Genome browser session  
(e.g. [UCSC](#))

No longer applicable

### Methodology

## Replicates

Two IGHV mutated and two IGHV unmutated CLL patient samples.

## Sequencing depth

125bp paired-end mode. An average of 75 million paired reads was generated per sample

## Antibodies

Antibody used for ChIP is anti-H3K27ac (2 mg for 25 mg of chromatin; ab4729 Abcam, Cambridge, United Kingdom).

## Peak calling parameters

Peaks were identified with Macs2 (v2.0.10) with a q-value threshold of 0.01, according to the ENCODE Histone ChIP-seq Data Standards and Processing Pipeline (<https://www.encodeproject.org/chip-seq/histone/>).

## Data quality

Deeptools plotFingerprint v2 was used to assess ChIP-seq signal enrichment over background signal. In addition, we observed a large overlap (72%) between FANTOM5 human robust enhancers (defined by H3K27ac signal) and our CLL H3K27ac ChIP-seq peaks, confirming the reproducibility of our ChIP-seq data.

## Software

ChIP-seq data were processed according to the ENCODE Histone ChIP-seq Data Standards and Processing Pipeline (<https://www.encodeproject.org/chip-seq/histone/>). Raw reads were mapped to the human genome hg19 assembly using Burrows-Wheeler Aligner (BWA v0.7.17). Duplicate reads were removed using Picard (<https://broadinstitute.github.io/picard/>). Peaks were identified with Macs2 (v2.0.10) with a q-value threshold of 0.01. Peaks overlapping with Satellite repeat regions and Encode Blacklist were discarded.
